# Supplementary material for: Hydrophobic Rose Bengal Derivatives Exhibit Submicromolar-to-Subnanomolar Activity against Enveloped Viruses
Source: MDPI journal article supplement (doi:10.3390/biom12111609), 2022-11-01

# Hydrophobic Rose Bengal derivatives exhibit submicromolar-to-subnanomolar activity against enveloped viruses

Anna A. Rubekina,<sup>1,†</sup> Polina N. Kamzееva,<sup>2,†</sup> Vera A. Alferova,<sup>2,3</sup> Elena Yu. Shustova,<sup>4</sup> Ekaterina S. Kolpakova,<sup>4</sup> Elizaveta V. Yakovchuk,<sup>4</sup> Evgenia V. Karpova,<sup>4</sup> Maria O. Borodulina,<sup>4</sup> Evgeny S. Belyaev,<sup>5</sup> Alexei A. Khrulev,<sup>2</sup> Vladimir A. Korshun,<sup>2</sup> Evgeny A. Shirshin,<sup>1,6</sup> Liubov I. Kozlovskaya,<sup>4,7</sup> and Andrey V. Aralov<sup>2,\*</sup>

## Supplementary information

<sup>1</sup> Faculty of Physics, M.V. Lomonosov Moscow State University, 1-2 Leninskie Gory, 119234 Moscow, Russia

<sup>2</sup> Shemyakin-Ovchinnikov Institute of Bioorganic Chemistry, Miklukho-Maklaya 16/10, Moscow 117997, Russia

<sup>3</sup> Gause Institute of New Antibiotics, B. Pirogovskaya 11, 119021 Moscow, Russia,

<sup>4</sup> Chumakov Scientific Center for Research and Development of Immune-and-Biological Products, Russian Academy of Sciences (Institute of Poliomyelitis), Moscow, 108819, Russia

<sup>5</sup> Frumkin Institute of Physical Chemistry and Electrochemistry of the Russian Academy of Science, Moscow, 119071, Russia

<sup>6</sup> Laboratory of Clinical Biophotonics, Biomedical Science and Technology Park, I.M. Sechenov First Moscow State Medical University, Trubetskaya Str. 8-2, Moscow 119991, Russia

<sup>7</sup> Sechenov First Moscow State Medical University, Trubetskaya Str. 8-2, 119991 Moscow, Russia

\* Correspondence: Baruh238@mail.ru

† These authors contributed equally to this work

## Contents

|                                                                                                                                                                 |    |
|-----------------------------------------------------------------------------------------------------------------------------------------------------------------|----|
| Table S1. Antiviral activity of RB and 2a-e against non-enveloped viruses and cytotoxicity for RD cells .....                                                   | 3  |
| Figure S1. Fluorescence spectra of SOSG during LED irradiation (520 nm) .....                                                                                   | 4  |
| Figure S2. Absorption spectra of RB 1 (an additional 10-fold dilution) and its derivatives 2a-e in PBS containing 1% DMSO, used for solubility evaluation ..... | 5  |
| Figure S3. NMR spectra.....                                                                                                                                     | 6  |
| Rose Bengal n-Butyl Ester, Monosodium Salt <b>2a</b> , <sup>1</sup> H spectrum.....                                                                             | 6  |
| Rose Bengal n-Butyl Ester, Monosodium Salt <b>2a</b> , <sup>13</sup> C spectrum.....                                                                            | 6  |
| Rose Bengal n-Hexyl Ester, Monosodium Salt <b>2b</b> , <sup>1</sup> H spectrum.....                                                                             | 7  |
| Rose Bengal n- Hexyl Ester, Monosodium Salt <b>2b</b> , <sup>13</sup> C spectrum.....                                                                           | 7  |
| Rose Bengal n- Octyl Ester, Monosodium Salt <b>2c</b> , <sup>1</sup> H spectrum .....                                                                           | 8  |
| Rose Bengal n- Hexyl Ester, Monosodium Salt <b>2b</b> , <sup>13</sup> C spectrum.....                                                                           | 8  |
| Rose Bengal n-Decyl Ester, Monosodium Salt <b>2d</b> , <sup>1</sup> H spectrum .....                                                                            | 9  |
| Rose Bengal n-Decyl Ester, Monosodium Salt <b>2d</b> , <sup>13</sup> C spectrum .....                                                                           | 9  |
| Rose Bengal n-Dodecyl Ester, Monosodium Salt <b>2e</b> , <sup>1</sup> H spectrum.....                                                                           | 10 |
| Rose Bengal n-Dodecyl Ester, Monosodium Salt <b>2e</b> , <sup>13</sup> C spectrum .....                                                                         | 10 |

**Table S1. Antiviral activity of RB and 2a-e against non-enveloped viruses and cytotoxicity for RD cells**

| Cmpd      | EC <sub>50</sub> , $\mu\text{M}$ (M $\pm$ SD) <sup>a</sup> |            |             | CC <sub>50</sub> , $\mu\text{M}$ (M $\pm$ SD) <sup>b</sup> |
|-----------|------------------------------------------------------------|------------|-------------|------------------------------------------------------------|
|           | CVA16                                                      | E13        | PV1         | RD cells                                                   |
| <b>1</b>  | >100                                                       | >100       | >100        | 43 $\pm$ 10                                                |
| <b>2a</b> | >100                                                       | >100       | >100        | 21.3 $\pm$ 5.2                                             |
| <b>2b</b> | >100                                                       | >100       | >100        | 21.3 $\pm$ 5.2                                             |
| <b>2c</b> | >100                                                       | >100       | >100        | 21.3 $\pm$ 5.2                                             |
| <b>2d</b> | >100                                                       | >100       | >100        | 10.7 $\pm$ 2.6                                             |
| <b>2e</b> | >100                                                       | >100       | >100        | 21.3 $\pm$ 5.2                                             |
| NHC       | 50 $\pm$ 18                                                | 17 $\pm$ 8 | 25 $\pm$ 10 | >100                                                       |

<sup>a</sup> Effective concentration required to inhibit virus-induced cytopathic effect by 50%

<sup>b</sup> Compound concentration required to induce a reduction of fluorescence by 50%

**Figure S1. Fluorescence spectra of SOSG during LED irradiation (520 nm)**

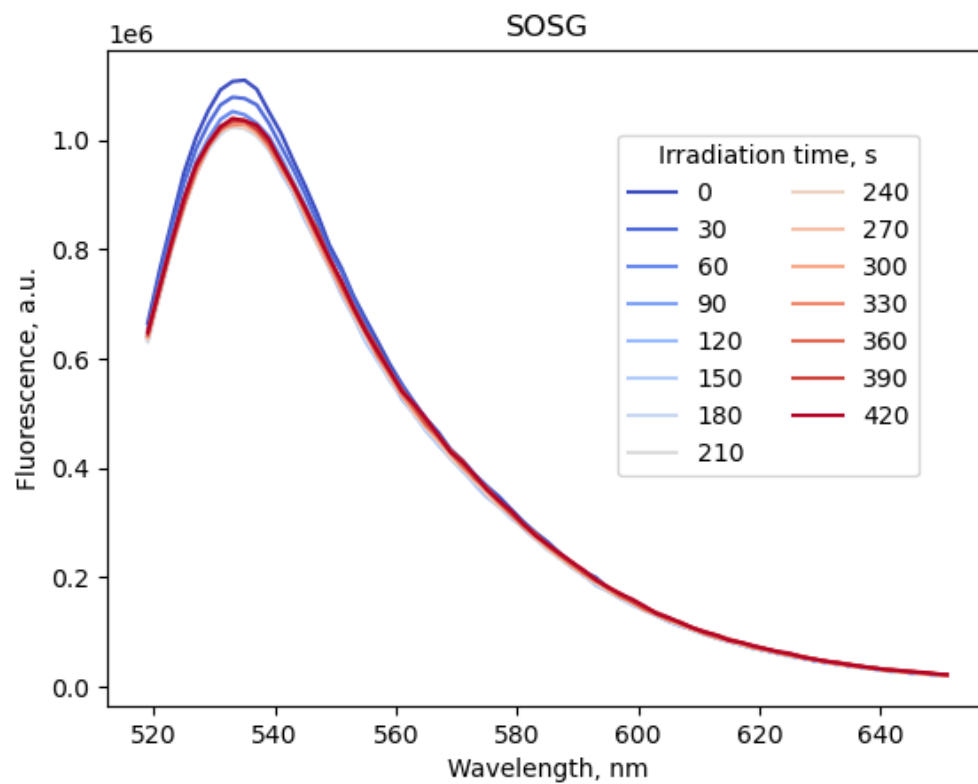

**Figure S2. Absorption spectra of RB 1 (an additional 10-fold dilution) and its derivatives 2a-e in PBS containing 1% DMSO, used for solubility evaluation**

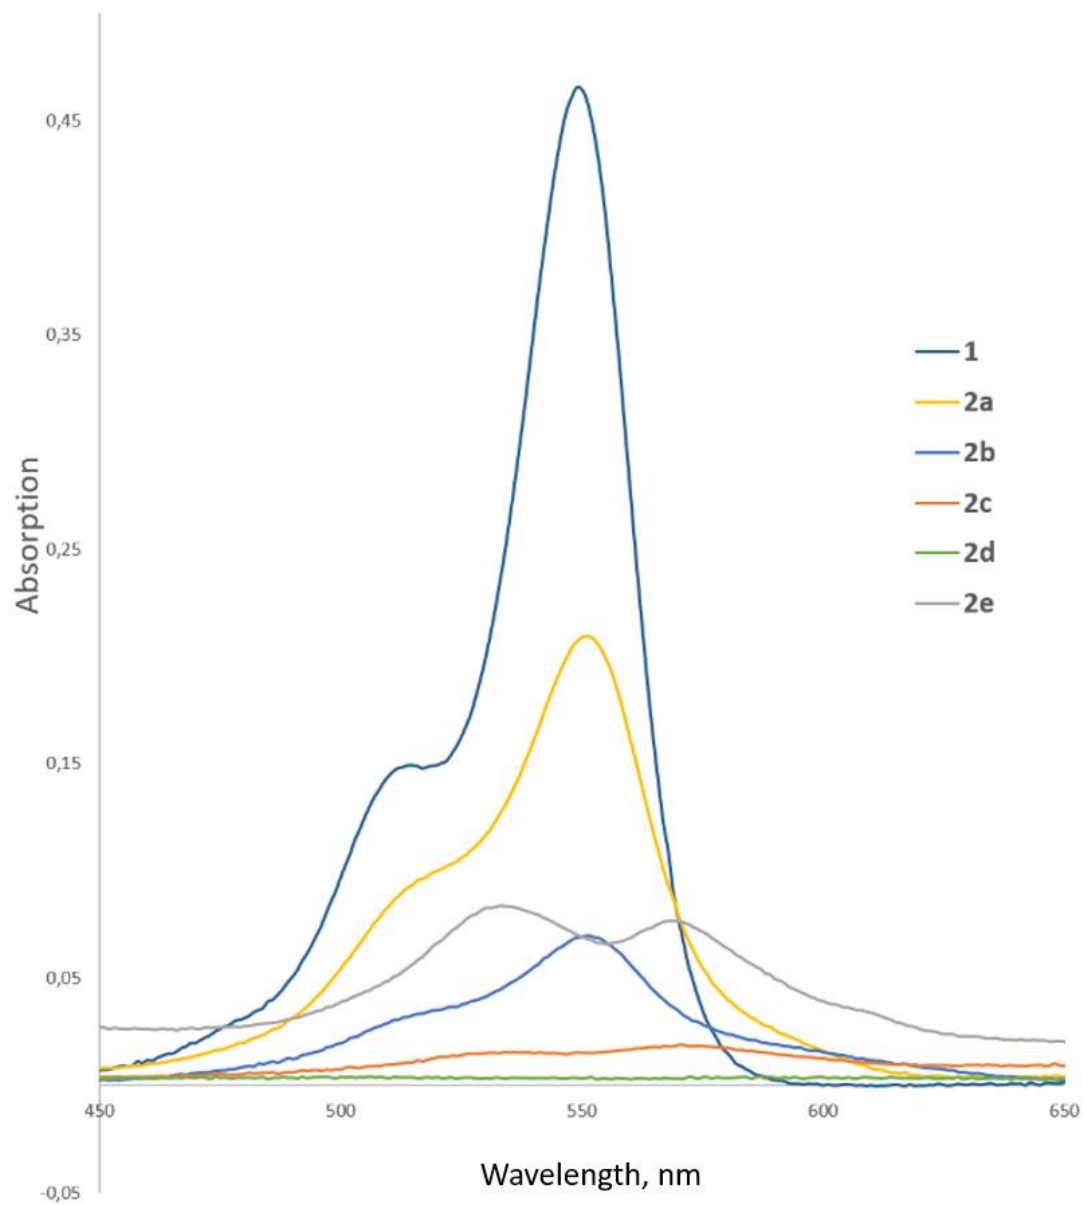

### Figure S3. NMR spectra.

Rose Bengal n-Butyl Ester, Monosodium Salt **2a**,  $^1\text{H}$  spectrum

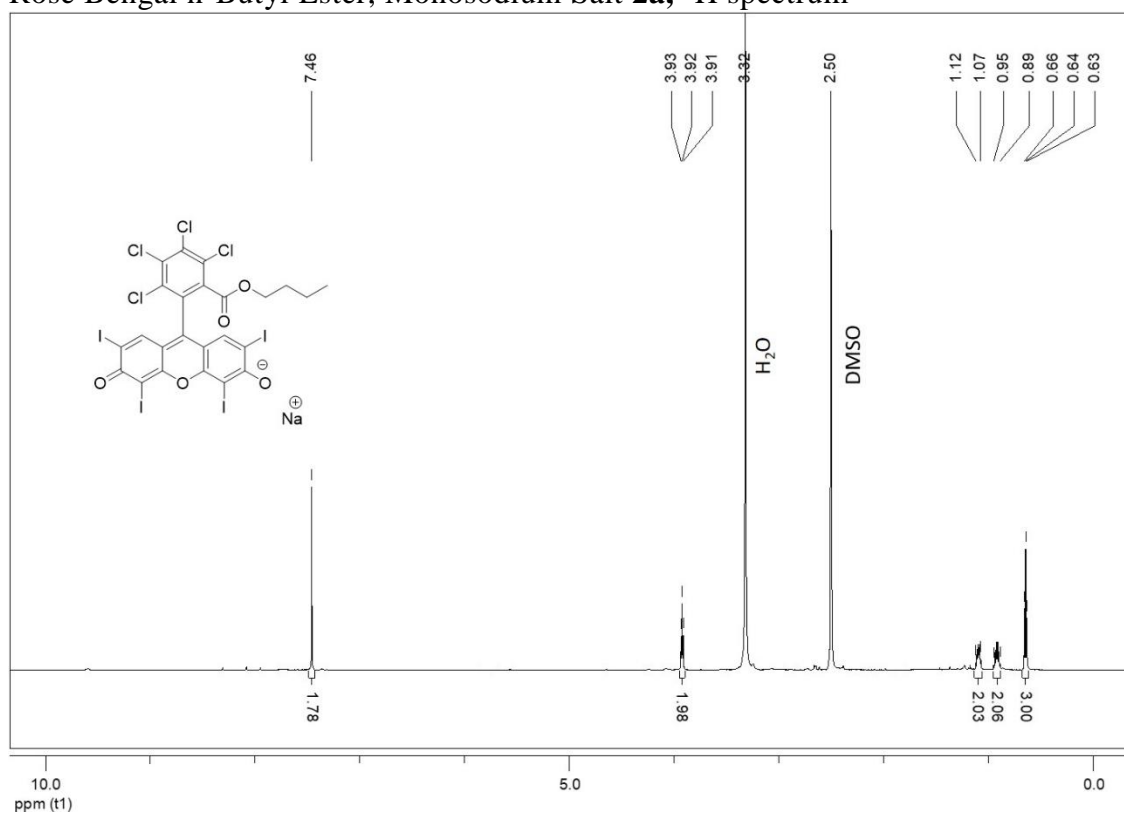

Rose Bengal n-Butyl Ester, Monosodium Salt **2a**,  $^{13}\text{C}$  spectrum

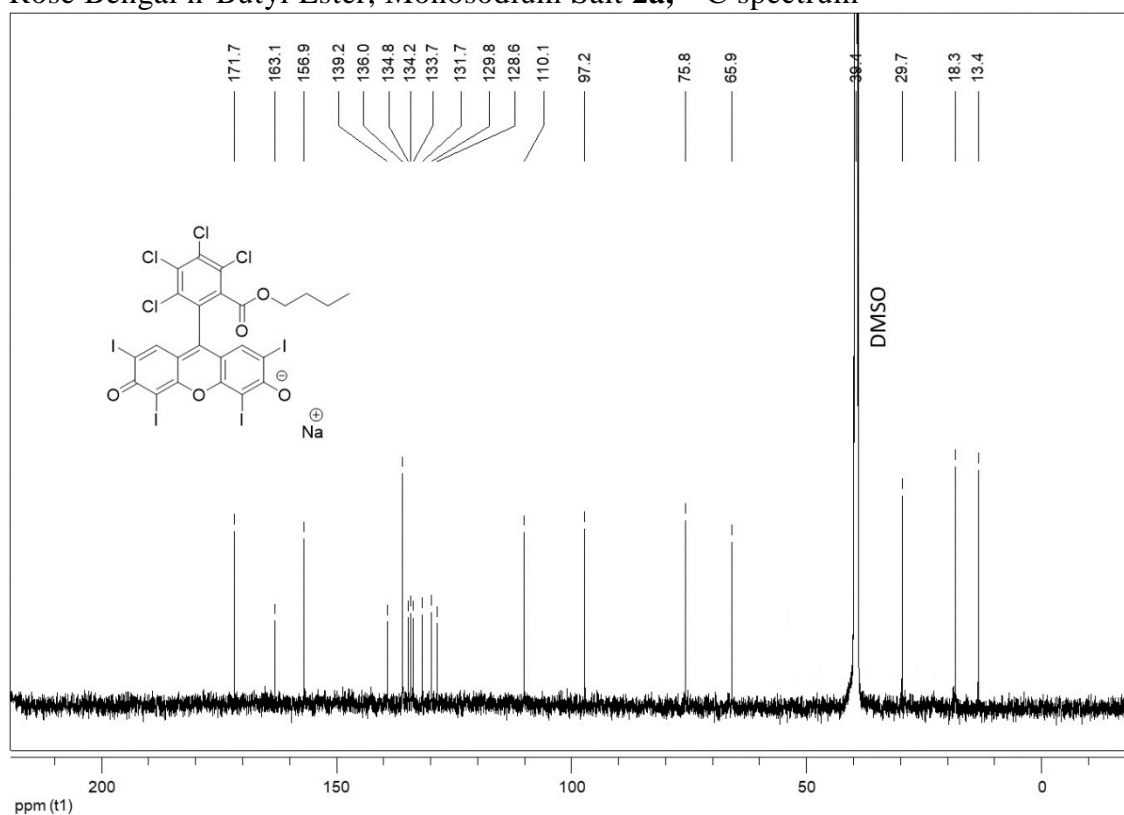

Rose Bengal n-Hexyl Ester, Monosodium Salt **2b**,  $^1\text{H}$  spectrum

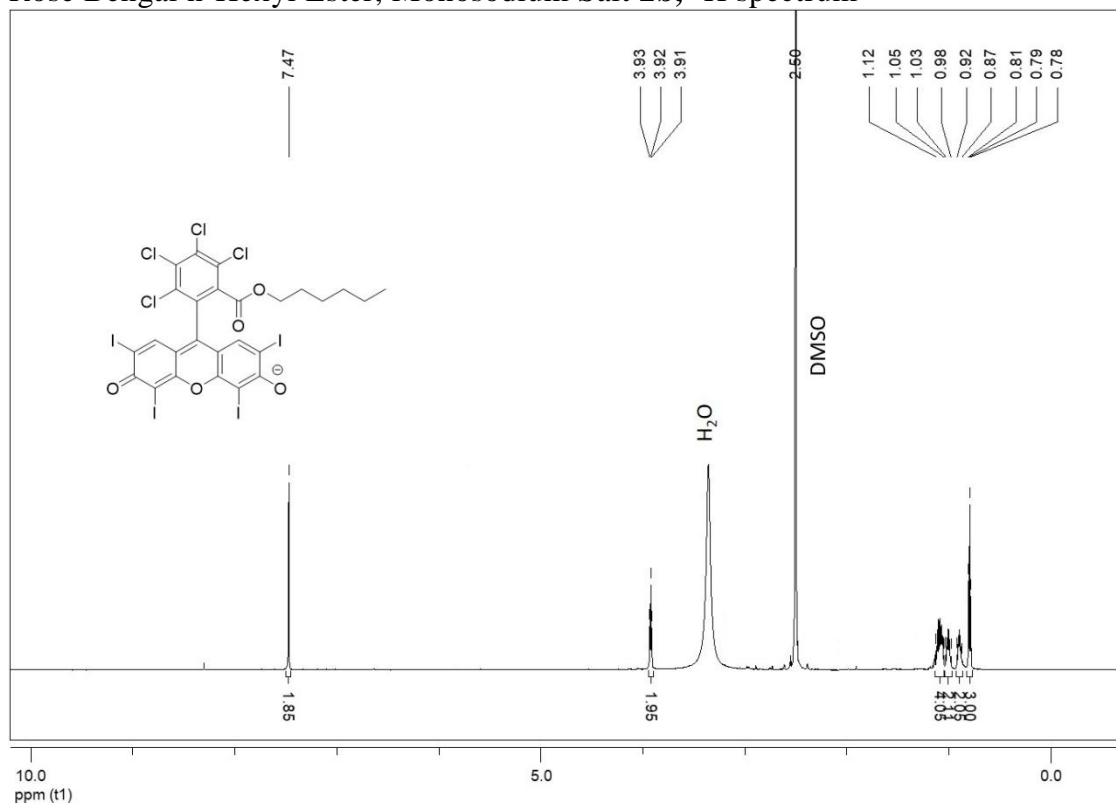

Rose Bengal n- Hexyl Ester, Monosodium Salt **2b**,  $^{13}\text{C}$  spectrum

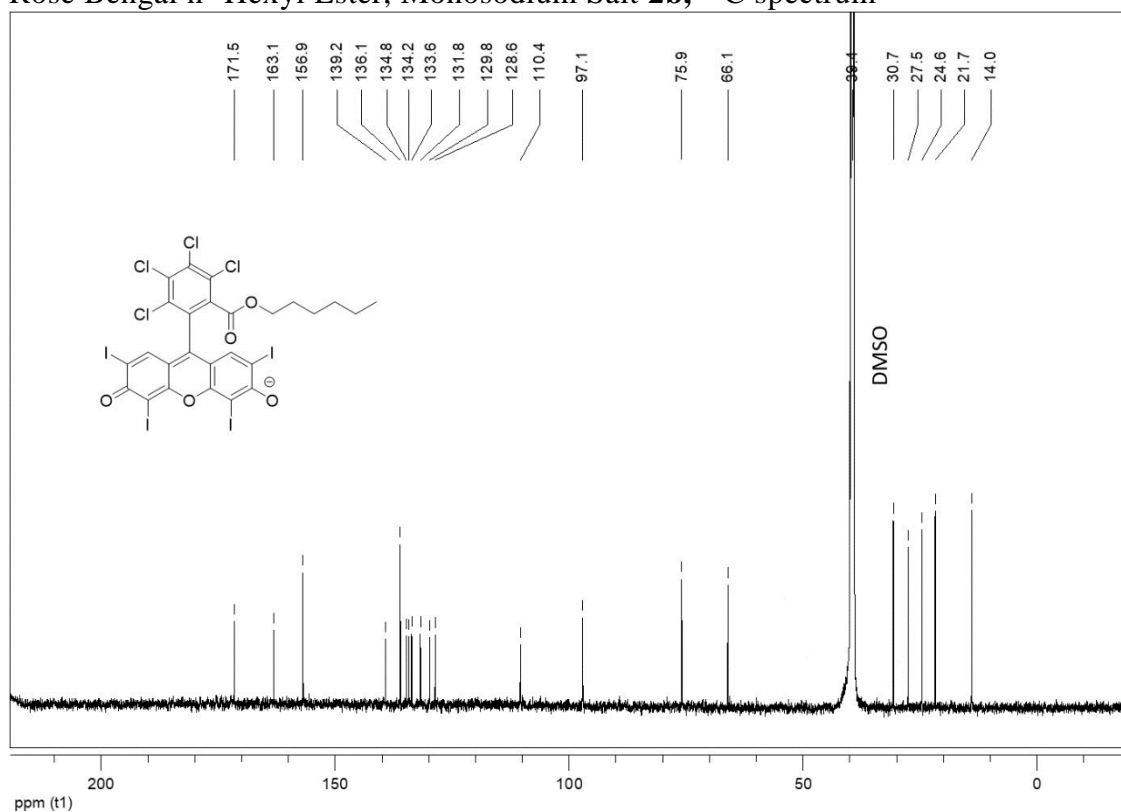

Rose Bengal n- Octyl Ester, Monosodium Salt **2c**,  $^1\text{H}$  spectrum

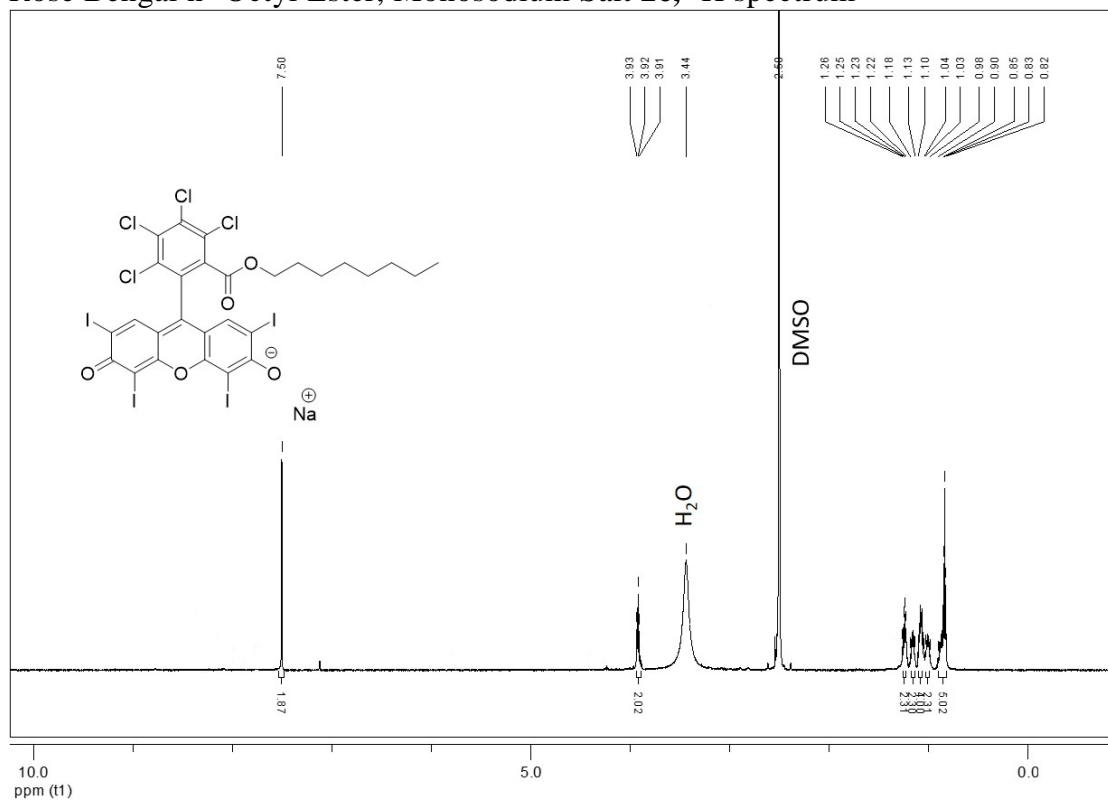

Rose Bengal n- Hexyl Ester, Monosodium Salt **2b**,  $^{13}\text{C}$  spectrum

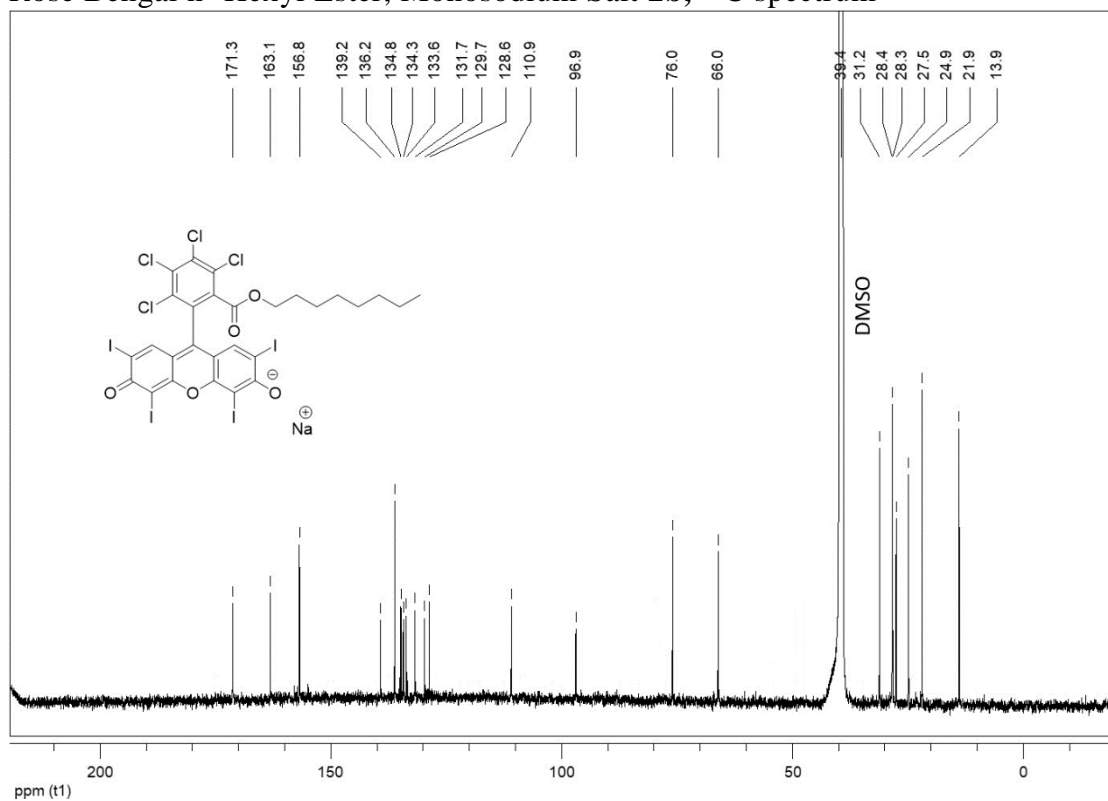



Rose Bengal n-Decyl Ester, Monosodium Salt **2d**,  $^1\text{H}$  spectrum

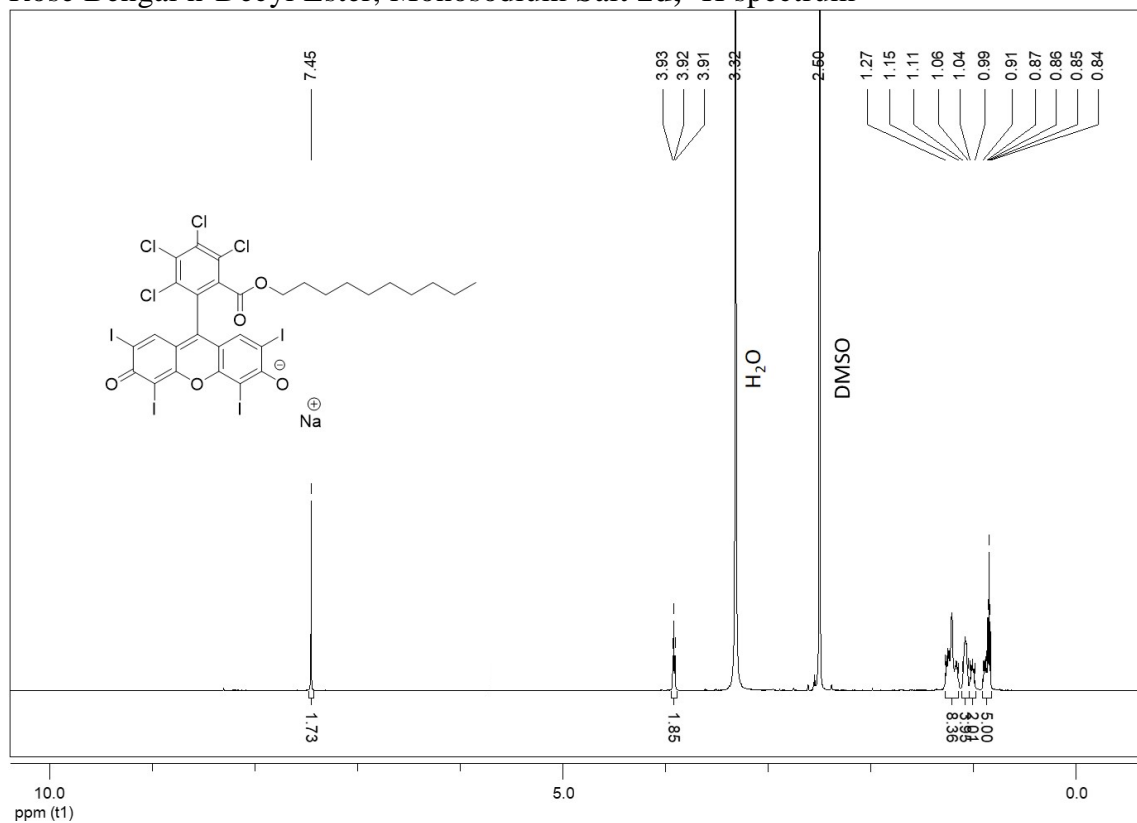

Rose Bengal n-Decyl Ester, Monosodium Salt **2d**,  $^{13}\text{C}$  spectrum

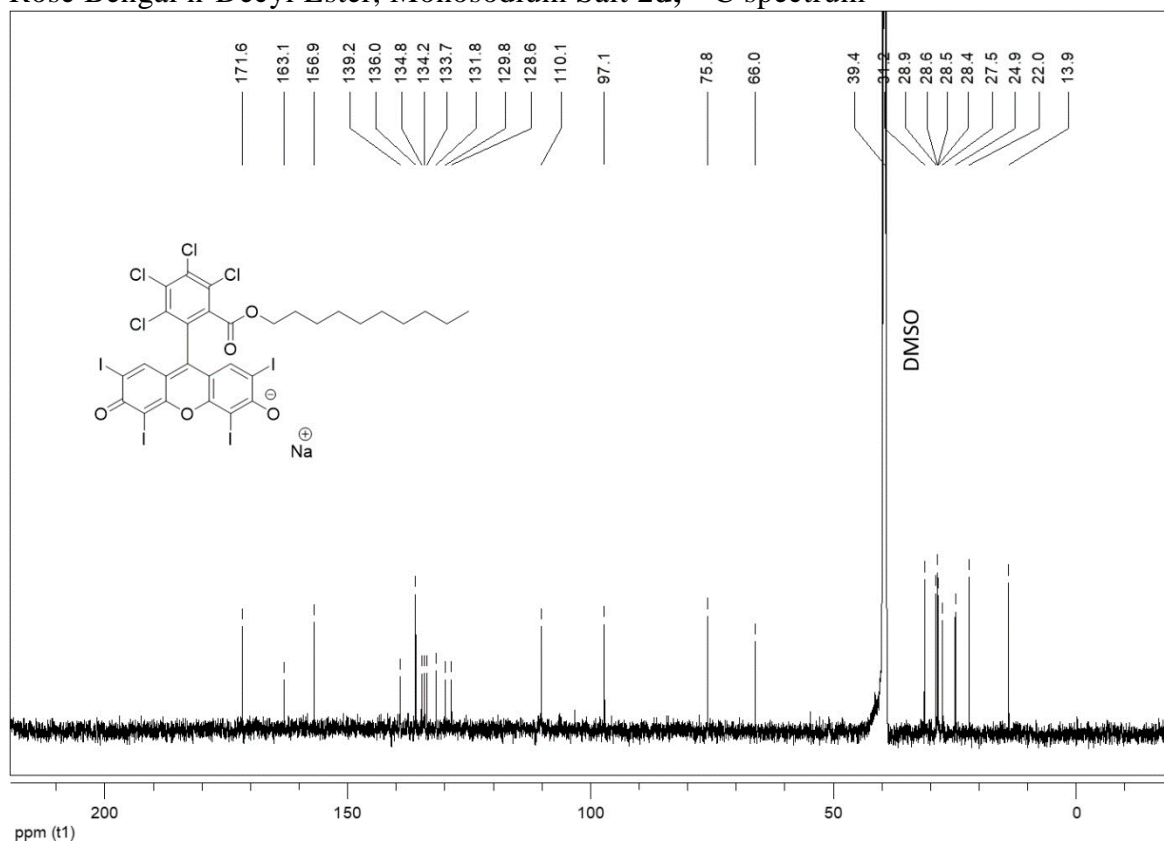

Rose Bengal n-Dodecyl Ester, Monosodium Salt **2e**,  $^1\text{H}$  spectrum

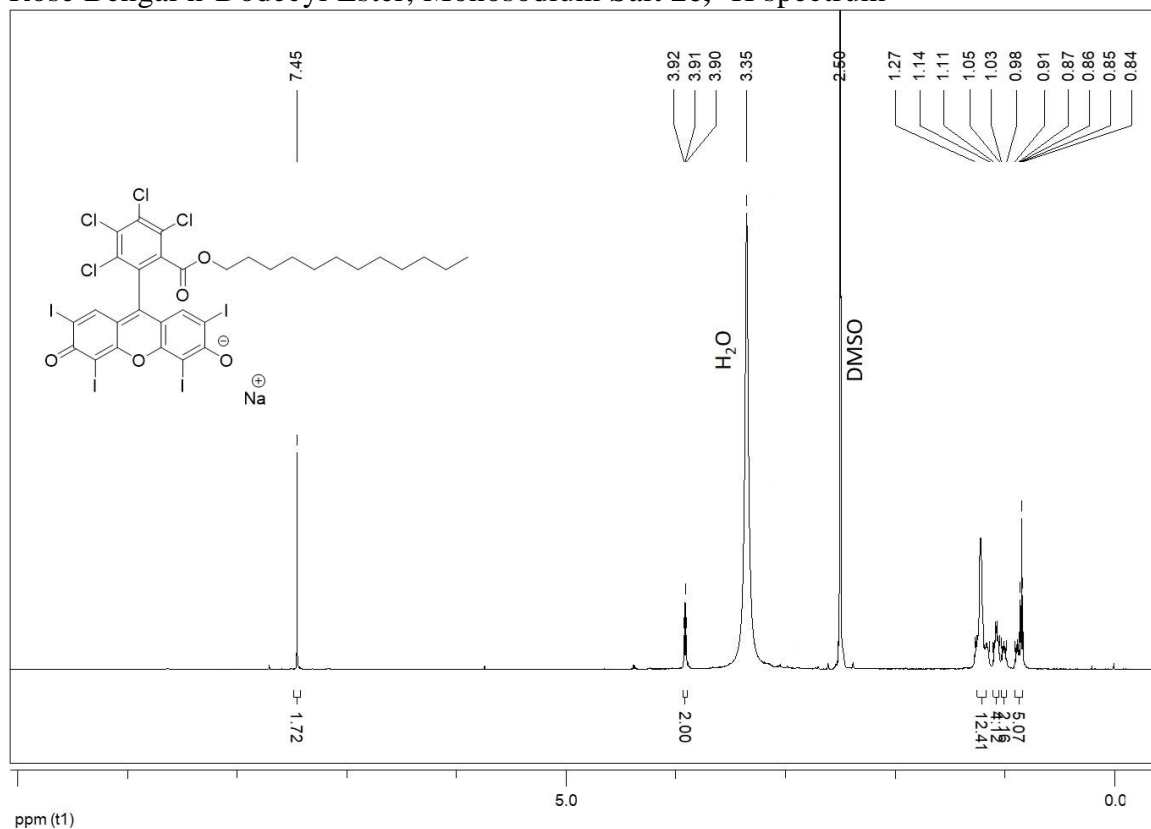

Rose Bengal n-Dodecyl Ester, Monosodium Salt **2e**,  $^{13}\text{C}$  spectrum

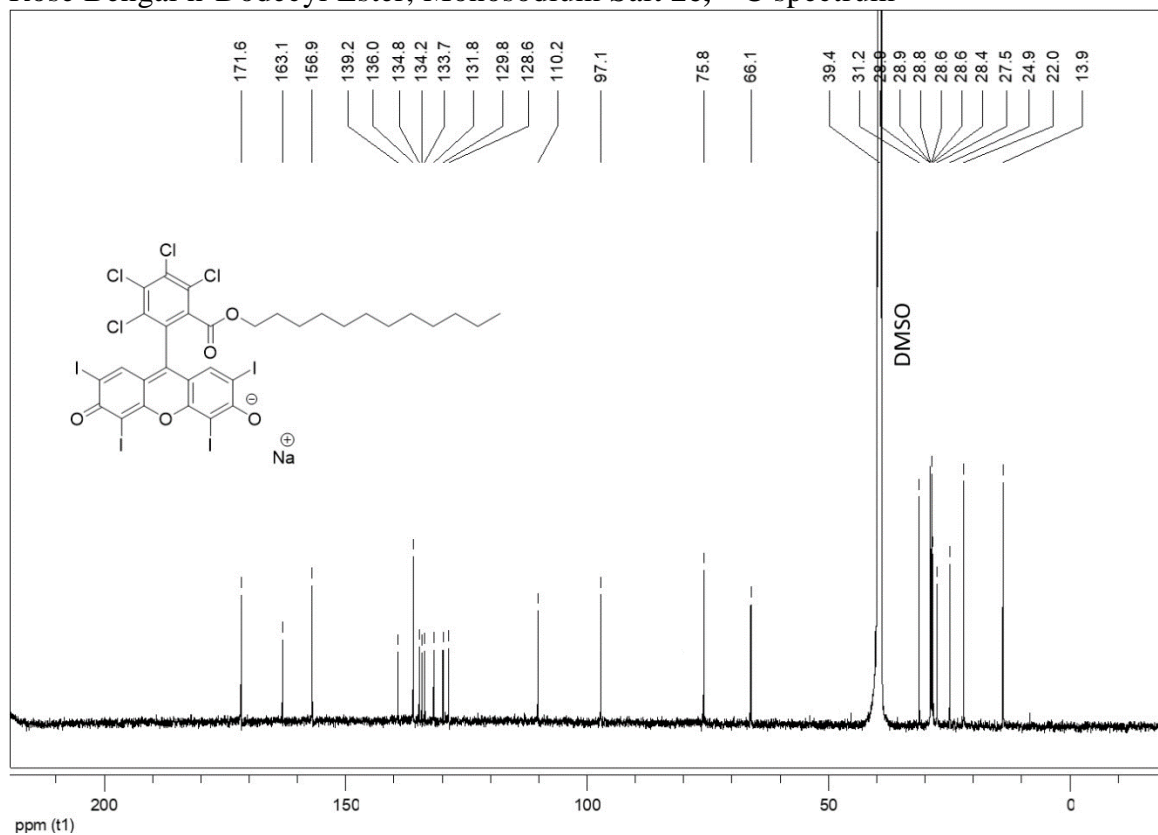

Supplement: s1 [file s1]
